# Supplementary material for: Investigation of the Protective Effects of Mesenchymal Stem Cell-Derived Exosomes on Hyperoxia-Induced Type II Alveolar Epithelial Cell Injury Based on Ferroptosis and Autophagy
Source: Research Square preprint supplement (doi:10.21203/rs.3.rs-4538714/v1), 2024-07-04
Supplement: Supplementary file 1 [file 175f8a440b324575913c8c46.pdf]

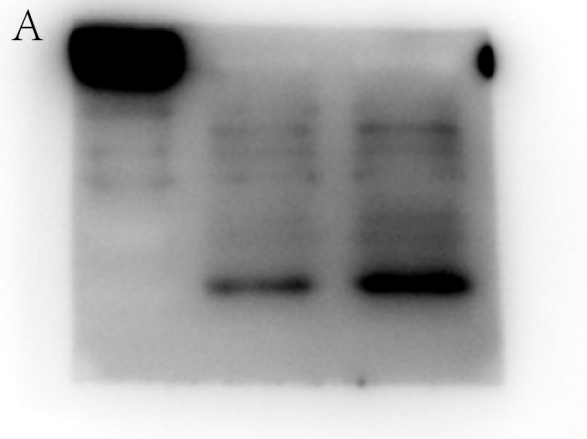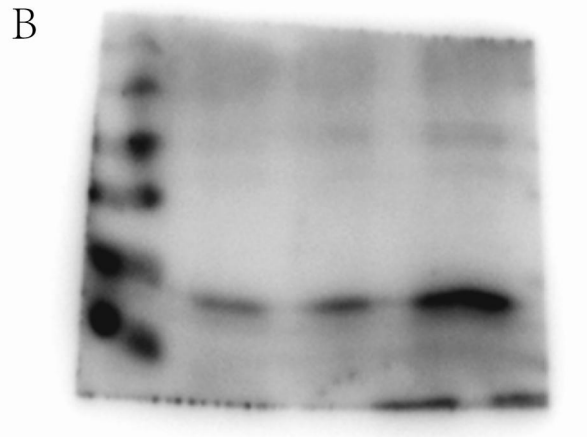

supplementary Figure 1: Full uncropped Gels and Blots image of Figure 1 C. A: CD9. B: CD81.

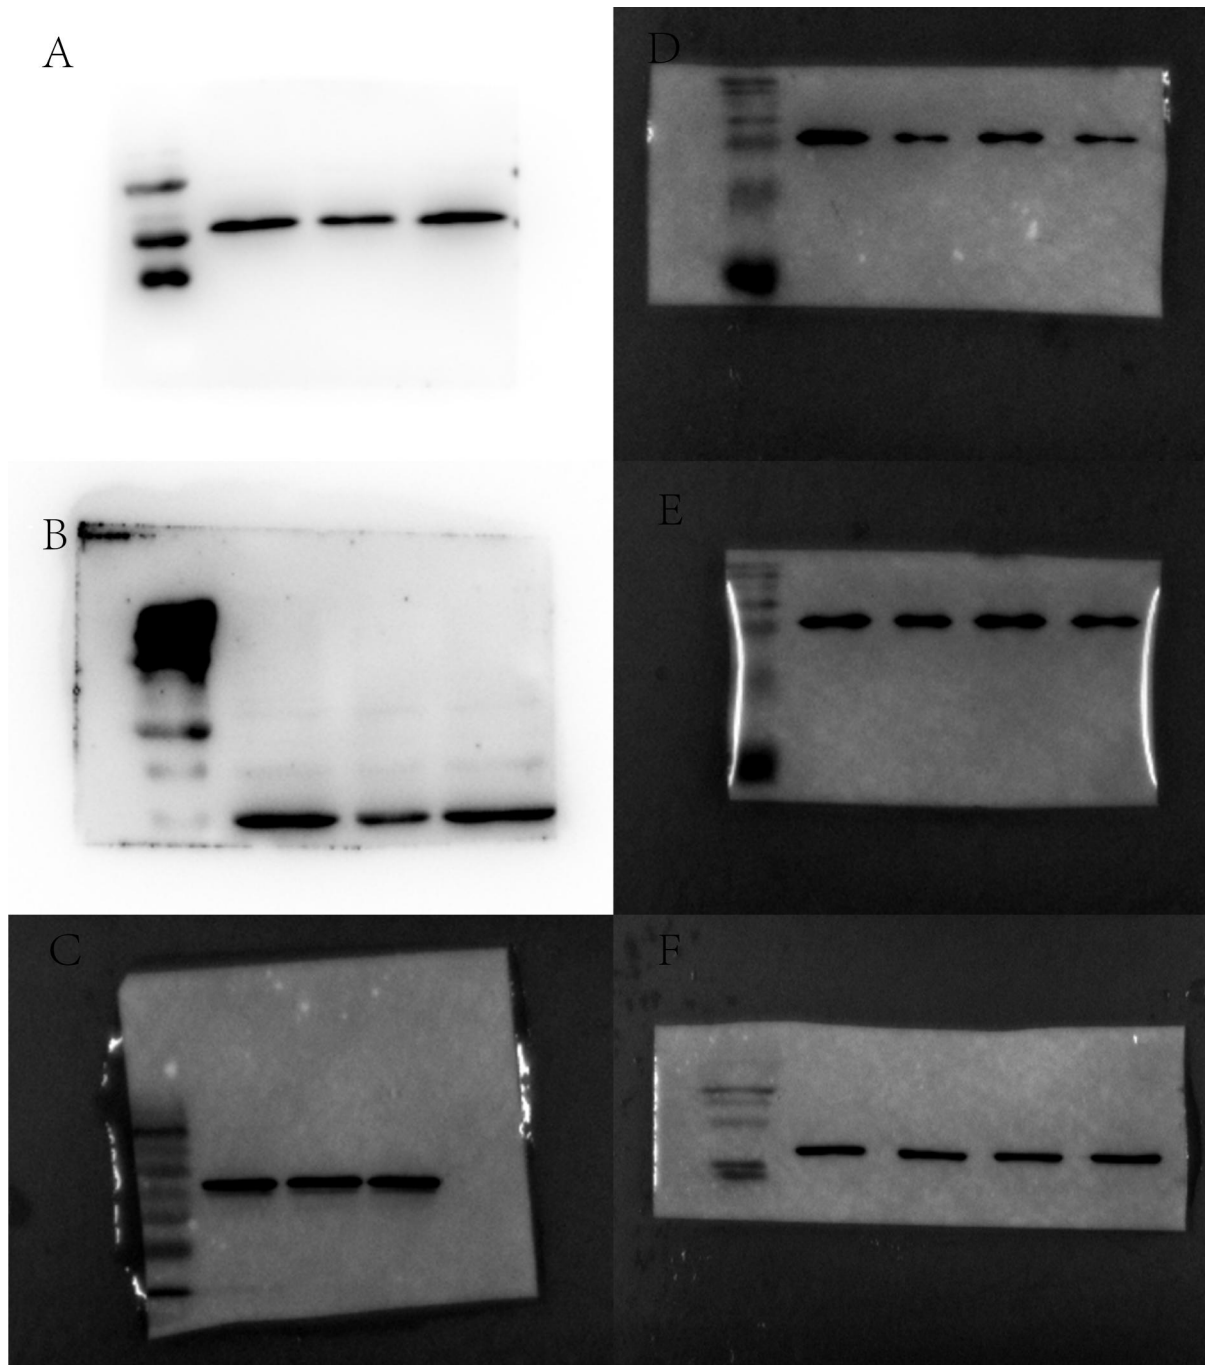

supplementary Figure 2: Full uncropped Gels and Blots image of Figure 5. A: GPX4 of Figure 5 B. B: SLC7A11 of Figure 5 B. C: GAPDH of Figure 5 B. D: GPX4 of Figure 5 C. E: SLC7A11 of Figure 5 C. F: GAPDH of Figure 5 C.

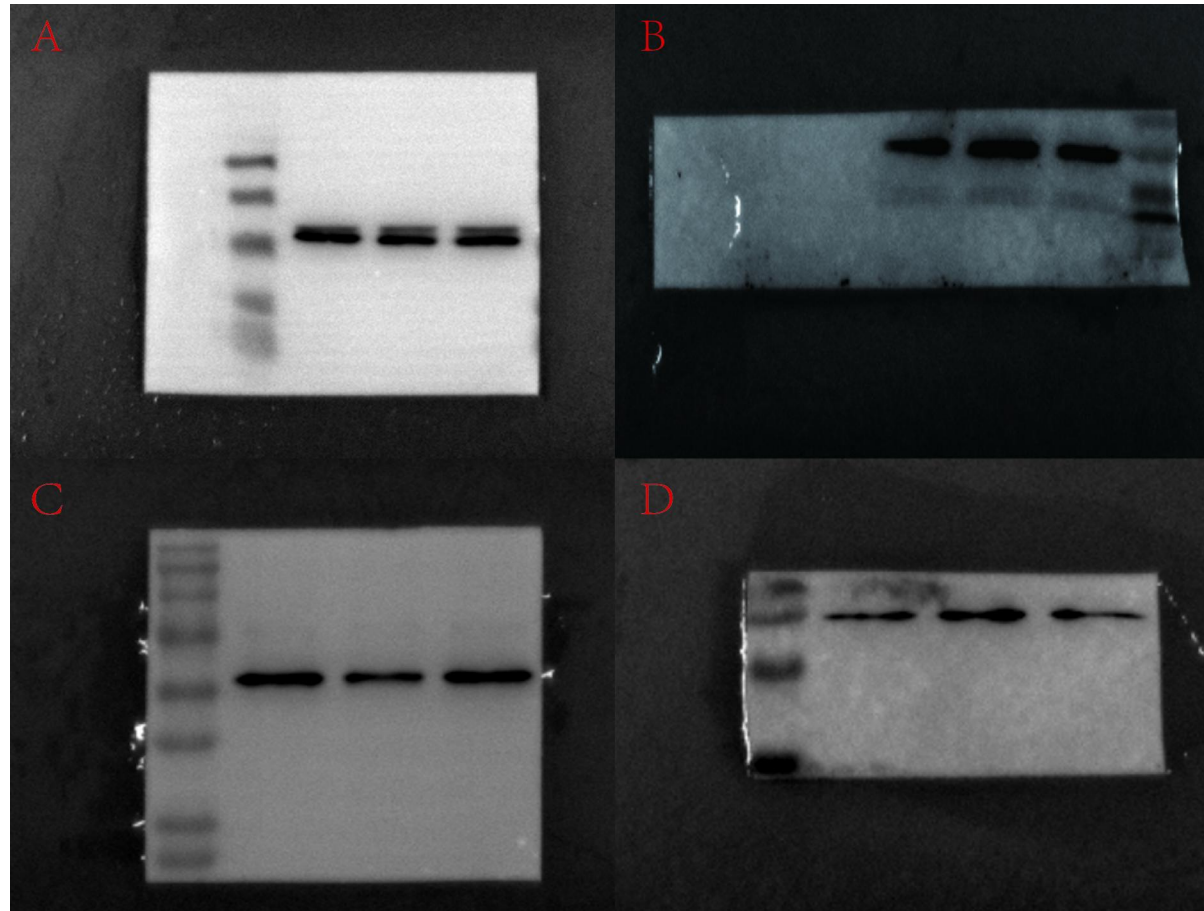

supplementary Figure 3: Full uncropped Gels and Blots image of Figure 6 B.

A: GAPDH of Figure 6 B. B: Beclin 1 of Figure 6 B. C: P62 of Figure 6 B. D:  
ATG5 of Figure 6 B.

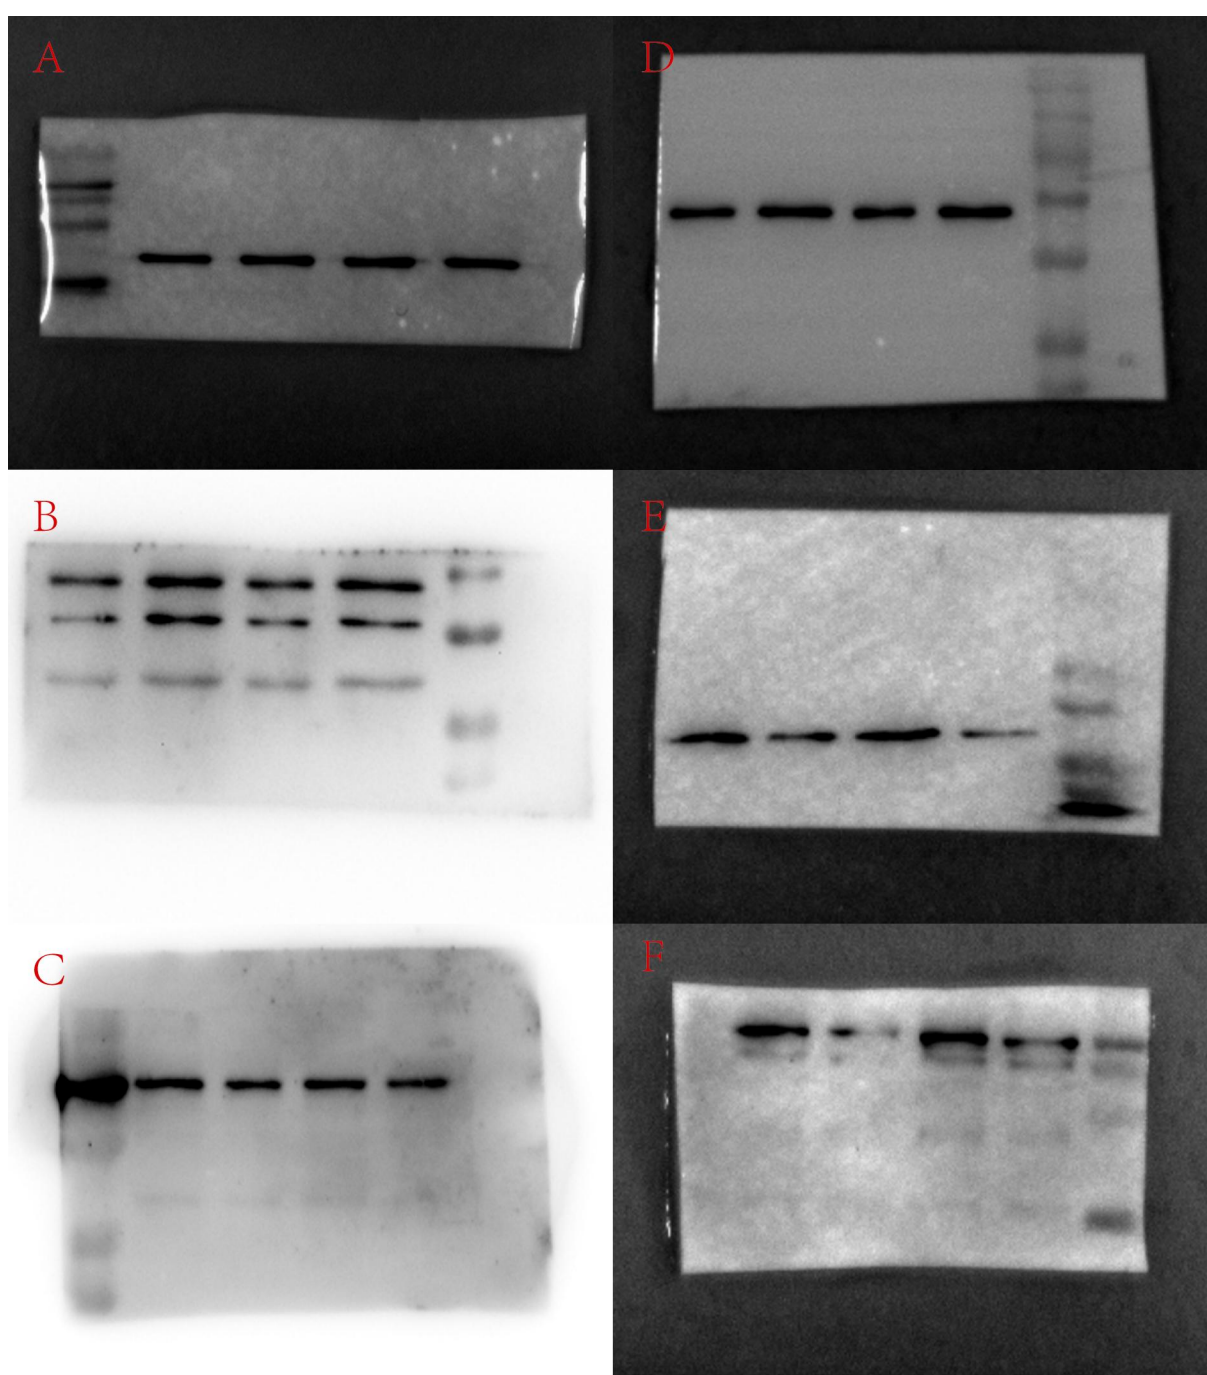

supplementary Figure 4: Full uncropped Gels and Blots image of Figure 6 C. A: GAPDH of Figure 6 C. B: Beclin 1 of Figure 6 C. C: p62 of Figure 6 C. D: ATG5 of Figure 6 C. E: Wnt1 of Figure 6 C. F:  $\beta$ -catenin of Figure 6 C.
